# Supplementary material for: Expanding molecular diagnostic coverage for tuberculosis by combining computer-aided chest radiography and sputum specimen pooling: a modeling study from four high burden countries
Source: Research Square preprint supplement (doi:10.21203/rs.3.rs-3813705/v1), 2024-01-05
Supplement: Supplementary file 1 [file 45dce6f4c36b81fe69aaf8de.docx]

# Supplementary information

## Supplementary Table 1.

Supplementary table 1. Testing data for the four countries across the AI-score deciles

| **AI-score decile** | **qXR score** | **Bangladesh (qXRv3)** | | **Nigeria**  **(qXRv3)** | | **Viet Nam (qXRv3)** | |  | **CAD4TB score** | **Bangladesh**  **(CAD4TB6)** | | **Zambia**  **(CAD4TB7)** | |
| --- | --- | --- | --- | --- | --- | --- | --- | --- | --- | --- | --- | --- | --- |
| Tests | Positive | Tests | Positive | Tests | Positive |  | Tests | Positive | Tests | Positive |
| *D1* | 0–0.09 | 9774 | 71 | 178 | 1 | 1123 | 5 |  | 0-9 | 10588 | 58 | 143 | 1 |
| *D2* | 0.10–0.19 | 1830 | 46 | 46 | 1 | 465 | 5 |  | 10-19 | 1741 | 110 | 46 | 5 |
| *D3* | 0.20–0.29 | 1027 | 43 | 59 | 2 | 295 | 5 |  | 20-29 | 1024 | 225 | 46 | 3 |
| *D4* | 0.30–0.39 | 982 | 56 | 155 | 2 | 274 | 8 |  | 30-39 | 915 | 212 | 54 | 14 |
| *D5* | 0.40–0.49 | 942 | 53 | 153 | 3 | 265 | 12 |  | 40-49 | 1021 | 750 | 82 | 41 |
| *D6* | 0.50–0.59 | 1006 | 96 | 94 | 9 | 331 | 18 |  | 50-59 | 892 | 411 | 80 | 22 |
| *D7* | 0.60–0.69 | 1104 | 136 | 62 | 3 | 352 | 22 |  | 60-69 | 877 | 199 | 103 | 27 |
| *D8* | 0.70–0.79 | 1676 | 276 | 45 | 5 | 402 | 22 |  | 70-79 | 1011 | 191 | 175 | 51 |
| *D9* | 0.80–0.89 | 3183 | 1114 | 72 | 14 | 635 | 73 |  | 80-89 | 1342 | 111 | 283 | 53 |
| *D10* | 0.90–0.99 | 2555 | 1788 | 157 | 45 | 932 | 285 |  | 90-99 | 4668 | 86 | 2667 | 56 |
|  | **Total** | 24079 | 3679 | 1021 | 85 | 5074 | 455 |  |  | 24079 | 2353 | 3679 | 273 |

### Supplementary table 1 note

The column “Tests” and “Positive” indicate total tests performed and positive tests out of the tests performed, respectively. For Bangladesh, both qXRv3 and CAD4TB6 readings were available for the same dataset with the former used in the main analysis.

## Supplementary table 2.

Supplementary table 2. Testing threshold information for the four countries across the AI-score deciles

| **AI-score decile** | **qXR score** | **Bangladesh**  **(qXRv3)** | **Nigeria**  **(qXRv3)** | **Viet Nam**  **(qXRv3)** |  | **CAD4TB score** | **Bangladesh**  **(CAD4TB6)** | **Zambia**  **(CAD4TB7)** |
| --- | --- | --- | --- | --- | --- | --- | --- | --- |
| *D1* | 0–0.09 | No testing | No testing | No testing |  | 0-9 | No testing | No testing |
| *D2* | 0.10–0.19 | No testing | No testing | No testing |  | 10-19 | No testing | No testing |
| *D3* | 0.20–0.29 | No testing | No testing | No testing |  | 20-29 | Testing | No testing |
| *D4* | 0.30–0.39 | Testing | Testing | No testing |  | 30-39 | Testing | Testing |
| *D5* | 0.40–0.49 | Testing | Testing | Testing |  | 40-49 | Testing | Testing |
| *D6* | 0.50–0.59 | Testing | Testing | Testing |  | 50-59 | Testing | Testing |
| *D7* | 0.60–0.69 | Testing | Testing | Testing |  | 60-69 | Testing | Testing |
| *D8* | 0.70–0.79 | Testing | Testing | Testing |  | 70-79 | Testing | Testing |
| *D9* | 0.80–0.89 | Testing | Testing | Testing |  | 80-89 | Testing | Testing |
| *D10* | 0.90–0.99 | Testing | Testing | Testing |  | 90-99 | Testing | Testing |

### Supplementary table 2 note

The columns with information on “Testing” and “No testing” indicate the AI-score deciles where testing was not performed based on the threshold defined in the methods to achieve 5% missed cases overall or closest thereof as a result of not employing Xpert testing in the previous deciles. For Bangladesh, both qXRv3 and CAD4TB6 readings were available for the same dataset with the former used in the main analysis.

## Supplementary table 3.

Supplementary table 3. Testing combination information for the four countries across the AI-score deciles

| **Country** | **Platform** | **CAD score** | **CXR Case** | **General Pooling Case** | **AI-guided Pooling Case** | **AI-guided CAD Cohort Pooling Case** |
| --- | --- | --- | --- | --- | --- | --- |
| Bangladesh | qXRv3 | 0–0.09 | No | No | No | No |
| Bangladesh | qXRv3 | 0.10–0.19 | No | No | No | No |
| Bangladesh | qXRv3 | 0.20–0.29 | No | No | No | No |
| Bangladesh | qXRv3 | 0.30–0.39 | Individual | Pool 1 | Pool 1 | Pool 1 |
| Bangladesh | qXRv3 | 0.40–0.49 | Individual | Pool 1 | Pool 1 | Pool 1 |
| Bangladesh | qXRv3 | 0.50–0.59 | Individual | Pool 1 | Pool 1 | Pool 1 |
| Bangladesh | qXRv3 | 0.60–0.69 | Individual | Pool 1 | Pool 1 | Pool 2 |
| Bangladesh | qXRv3 | 0.70–0.79 | Individual | Pool 1 | Pool 1 | Pool 2 |
| Bangladesh | qXRv3 | 0.80–0.89 | Individual | Pool 1 | Individual | Individual |
| Bangladesh | qXRv3 | 0.90–0.99 | Individual | Pool 1 | Individual | Individual |
| Bangladesh | CAD4TB6 | 0-9 | No | No | No | No |
| Bangladesh | CAD4TB6 | 10-19 | No | No | No | No |
| Bangladesh | CAD4TB6 | 20-29 | Individual | Pool 1 | Pool 1 | Pool 1 |
| Bangladesh | CAD4TB6 | 30-39 | Individual | Pool 1 | Pool 1 | Pool 1 |
| Bangladesh | CAD4TB6 | 40-49 | Individual | Pool 1 | Pool 1 | Pool 1 |
| Bangladesh | CAD4TB6 | 50-59 | Individual | Pool 1 | Pool 1 | Pool 1 |
| Bangladesh | CAD4TB6 | 60-69 | Individual | Pool 1 | Pool 1 | Pool 2 |
| Bangladesh | CAD4TB6 | 70-79 | Individual | Pool 1 | Pool 1 | Pool 2 |
| Bangladesh | CAD4TB6 | 80-89 | Individual | Pool 1 | Pool 1 | Pool 3 |
| Bangladesh | CAD4TB6 | 90-99 | Individual | Pool 1 | Individual | Individual |
| Nigeria | qXRv3 | 0–0.09 | No | No | No | No |
| Nigeria | qXRv3 | 0.10–0.19 | No | No | No | No |
| Nigeria | qXRv3 | 0.20–0.29 | No | No | No | No |
| Nigeria | qXRv3 | 0.30–0.39 | Individual | Pool 1 | Pool 1 | Pool 1 |
| Nigeria | qXRv3 | 0.40–0.49 | Individual | Pool 1 | Pool 1 | Pool 1 |
| Nigeria | qXRv3 | 0.50–0.59 | Individual | Pool 1 | Pool 1 | Pool 1 |
| Nigeria | qXRv3 | 0.60–0.69 | Individual | Pool 1 | Pool 1 | Pool 1 |
| Nigeria | qXRv3 | 0.70–0.79 | Individual | Pool 1 | Pool 1 | Pool 1 |
| Nigeria | qXRv3 | 0.80–0.89 | Individual | Pool 1 | Pool 1 | Pool 2 |
| Nigeria | qXRv3 | 0.90–0.99 | Individual | Pool 1 | Individual | Pool 2 |
| Viet Nam | qXRv3 | 0–0.09 | No | No | No | No |
| Viet Nam | qXRv3 | 0.10–0.19 | No | No | No | No |
| Viet Nam | qXRv3 | 0.20–0.29 | No | No | No | No |
| Viet Nam | qXRv3 | 0.30–0.39 | No | No | No | No |
| Viet Nam | qXRv3 | 0.40–0.49 | Individual | Pool 1 | Pool 1 | Pool 1 |
| Viet Nam | qXRv3 | 0.50–0.59 | Individual | Pool 1 | Pool 1 | Pool 1 |
| Viet Nam | qXRv3 | 0.60–0.69 | Individual | Pool 1 | Pool 1 | Pool 1 |
| Viet Nam | qXRv3 | 0.70–0.79 | Individual | Pool 1 | Pool 1 | Pool 1 |
| Viet Nam | qXRv3 | 0.80–0.89 | Individual | Pool 1 | Pool 1 | Pool 2 |
| Viet Nam | qXRv3 | 0.90–0.99 | Individual | Pool 1 | Individual | Individual |
| Zambia | CAD4TB7 | 0-9 | No | No | No | No |
| Zambia | CAD4TB7 | 10-19 | No | No | No | No |
| Zambia | CAD4TB7 | 20-29 | No | No | No | No |
| Zambia | CAD4TB7 | 30-39 | Individual | Pool 1 | Pool 1 | Pool 1 |
| Zambia | CAD4TB7 | 40-49 | Individual | Pool 1 | Pool 1 | Pool 1 |
| Zambia | CAD4TB7 | 50-59 | Individual | Pool 1 | Pool 1 | Pool 1 |
| Zambia | CAD4TB7 | 60-69 | Individual | Pool 1 | Pool 1 | Pool 2 |
| Zambia | CAD4TB7 | 70-79 | Individual | Pool 1 | Pool 1 | Pool 2 |
| Zambia | CAD4TB7 | 80-89 | Individual | Pool 1 | Individual | Individual |
| Zambia | CAD4TB7 | 90-99 | Individual | Pool 1 | Individual | Individual |

### Supplementary table 3 note

The column with information on testing indicates the testing strategy utilized for each AI-score decile across the four approaches. An additional approach, “AI-guided CAD Cohort Pooling Case”, is also shown that is not included in the main analysis. For Bangladesh, both qXRv3 and CAD4TB6 readings were available for the same dataset with the former used in the main analysis.

## Supplementary table 4.

Supplementary table 4. Results of the sensitivity analysis based on pool size of 3 and different sensitivity and specificity parameters of the pooling method

#### A. Bangladesh-qXRv3

| **Country** | **Platform** | **Pool size** | **Pooling case** | **Pooling sensitivity** | **Pooling specificity: 0.98** | **Pooling specificity: 1** | **Comparator (Pooling sensitivity & specificity: 1)** | **Savings in specificity: 0.98** | **Savings in specificity: 1** |
| --- | --- | --- | --- | --- | --- | --- | --- | --- | --- |
| Bangladesh | qXRv3 | Pools of 3 | CXR Case | 0.95 | 11448 | 11448 | 11448 | 0.0% | 0.0% |
| Bangladesh | qXRv3 | Pools of 3 | General Pooling Case | 0.95 | 11154 | 11079 | 11461 | 2.7% | 3.3% |
| Bangladesh | qXRv3 | Pools of 3 | AI-guided Pooling Case | 0.95 | 9298 | 9217 | 9300 | 0.0% | 0.9% |
| Bangladesh | qXRv3 | Pools of 3 | AI-guided CAD Cohort Pooling Case | 0.95 | 9277 | 9195 | 9277 | 0.0% | 0.9% |
| Bangladesh | qXRv3 | Pools of 3 | CXR Case | 1 | 11448 | 11448 | 11448 | 0.0% | 0.0% |
| Bangladesh | qXRv3 | Pools of 3 | General Pooling Case | 1 | 11537 | 11461 | 11461 | -0.7% | 0.0% |
| Bangladesh | qXRv3 | Pools of 3 | AI-guided Pooling Case | 1 | 9381 | 9300 | 9300 | -0.9% | 0.0% |
| Bangladesh | qXRv3 | Pools of 3 | AI-guided CAD Cohort Pooling Case | 1 | 9359 | 9277 | 9277 | -0.9% | 0.0% |
| Bangladesh | qXRv3 | Pools of 4 | CXR Case | 0.95 | 11448 | 11448 | 11448 | 0.0% | 0.0% |
| Bangladesh | qXRv3 | Pools of 4 | General Pooling Case | 0.95 | 11288 | 11236 | 11676 | 3.3% | 3.8% |
| Bangladesh | qXRv3 | Pools of 4 | AI-guided Pooling Case | 0.95 | 9230 | 9157 | 9262 | 0.4% | 1.1% |
| Bangladesh | qXRv3 | Pools of 4 | AI-guided CAD Cohort Pooling Case | 0.95 | 9191 | 9118 | 9221 | 0.3% | 1.1% |
| Bangladesh | qXRv3 | Pools of 4 | CXR Case | 1 | 11448 | 11448 | 11448 | 0.0% | 0.0% |
| Bangladesh | qXRv3 | Pools of 4 | General Pooling Case | 1 | 11729 | 11676 | 11676 | -0.5% | 0.0% |
| Bangladesh | qXRv3 | Pools of 4 | AI-guided Pooling Case | 1 | 9334 | 9262 | 9262 | -0.8% | 0.0% |
| Bangladesh | qXRv3 | Pools of 4 | AI-guided CAD Cohort Pooling Case | 1 | 9294 | 9221 | 9221 | -0.8% | 0.0% |

#### B. Bangladesh-CAD4TB6

| **Country** | **Platform** | **Pool size** | **Pooling case** | **Pooling sensitivity** | **Pooling specificity: 0.98** | **Pooling specificity: 1** | **Comparator (Pooling sensitivity & specificity: 1)** | **Savings in specificity: 0.98** | **Savings in specificity: 1** |
| --- | --- | --- | --- | --- | --- | --- | --- | --- | --- |
| Bangladesh | CAD4TB6 | Pools of 3 | CXR Case | 0.95 | 11750 | 11750 | 11750 | 0.0% | 0.0% |
| Bangladesh | CAD4TB6 | Pools of 3 | General Pooling Case | 0.95 | 11284 | 11202 | 11585 | 2.6% | 3.3% |
| Bangladesh | CAD4TB6 | Pools of 3 | AI-guided Pooling Case | 0.95 | 9210 | 9112 | 9222 | 0.1% | 1.2% |
| Bangladesh | CAD4TB6 | Pools of 3 | AI-guided CAD Cohort Pooling Case | 0.95 | 9156 | 9057 | 9163 | 0.1% | 1.2% |
| Bangladesh | CAD4TB6 | Pools of 3 | CXR Case | 1 | 11750 | 11750 | 11750 | 0.0% | 0.0% |
| Bangladesh | CAD4TB6 | Pools of 3 | General Pooling Case | 1 | 11667 | 11585 | 11585 | -0.7% | 0.0% |
| Bangladesh | CAD4TB6 | Pools of 3 | AI-guided Pooling Case | 1 | 9320 | 9222 | 9222 | -1.1% | 0.0% |
| Bangladesh | CAD4TB6 | Pools of 3 | AI-guided CAD Cohort Pooling Case | 1 | 9263 | 9163 | 9163 | -1.1% | 0.0% |
| Bangladesh | CAD4TB6 | Pools of 4 | CXR Case | 0.95 | 11750 | 11750 | 11750 | 0.0% | 0.0% |
| Bangladesh | CAD4TB6 | Pools of 4 | General Pooling Case | 0.95 | 11432 | 11374 | 11819 | 3.3% | 3.8% |
| Bangladesh | CAD4TB6 | Pools of 4 | AI-guided Pooling Case | 0.95 | 9149 | 9062 | 9200 | 0.6% | 1.5% |
| Bangladesh | CAD4TB6 | Pools of 4 | AI-guided CAD Cohort Pooling Case | 0.95 | 9053 | 8965 | 9097 | 0.5% | 1.5% |
| Bangladesh | CAD4TB6 | Pools of 4 | CXR Case | 1 | 11750 | 11750 | 11750 | 0.0% | 0.0% |
| Bangladesh | CAD4TB6 | Pools of 4 | General Pooling Case | 1 | 11876 | 11819 | 11819 | -0.5% | 0.0% |
| Bangladesh | CAD4TB6 | Pools of 4 | AI-guided Pooling Case | 1 | 9287 | 9200 | 9200 | -1.0% | 0.0% |
| Bangladesh | CAD4TB6 | Pools of 4 | AI-guided CAD Cohort Pooling Case | 1 | 9185 | 9097 | 9097 | -1.0% | 0.0% |

#### C. Nigeria-qXRv3

| **Country** | **Platform** | **Pool size** | **Pooling case** | **Pooling sensitivity** | **Pooling specificity: 0.98** | **Pooling specificity: 1** | **Comparator (Pooling sensitivity & specificity: 1)** | **Savings in specificity: 0.98** | **Savings in specificity: 1** |
| --- | --- | --- | --- | --- | --- | --- | --- | --- | --- |
| Nigeria | qXRv3 | Pools of 3 | CXR Case | 0.95 | 738 | 738 | 738 | 0.0% | 0.0% |
| Nigeria | qXRv3 | Pools of 3 | General Pooling Case | 0.95 | 463 | 453 | 464 | 0.2% | 2.4% |
| Nigeria | qXRv3 | Pools of 3 | AI-guided Pooling Case | 0.95 | 457 | 448 | 453 | -0.9% | 1.1% |
| Nigeria | qXRv3 | Pools of 3 | AI-guided CAD Cohort Pooling Case | 0.95 | 446 | 435 | 445 | -0.2% | 2.3% |
| Nigeria | qXRv3 | Pools of 3 | CXR Case | 1 | 738 | 738 | 738 | 0.0% | 0.0% |
| Nigeria | qXRv3 | Pools of 3 | General Pooling Case | 1 | 474 | 464 | 464 | -2.2% | 0.0% |
| Nigeria | qXRv3 | Pools of 3 | AI-guided Pooling Case | 1 | 462 | 453 | 453 | -2.0% | 0.0% |
| Nigeria | qXRv3 | Pools of 3 | AI-guided CAD Cohort Pooling Case | 1 | 456 | 445 | 445 | -2.5% | 0.0% |
| Nigeria | qXRv3 | Pools of 4 | CXR Case | 0.95 | 738 | 738 | 738 | 0.0% | 0.0% |
| Nigeria | qXRv3 | Pools of 4 | General Pooling Case | 0.95 | 455 | 446 | 459 | 0.9% | 2.8% |
| Nigeria | qXRv3 | Pools of 4 | AI-guided Pooling Case | 0.95 | 436 | 427 | 434 | -0.5% | 1.6% |
| Nigeria | qXRv3 | Pools of 4 | AI-guided CAD Cohort Pooling Case | 0.95 | 426 | 415 | 427 | 0.2% | 2.8% |
| Nigeria | qXRv3 | Pools of 4 | CXR Case | 1 | 738 | 738 | 738 | 0.0% | 0.0% |
| Nigeria | qXRv3 | Pools of 4 | General Pooling Case | 1 | 469 | 459 | 459 | -2.2% | 0.0% |
| Nigeria | qXRv3 | Pools of 4 | AI-guided Pooling Case | 1 | 443 | 434 | 434 | -2.1% | 0.0% |
| Nigeria | qXRv3 | Pools of 4 | AI-guided CAD Cohort Pooling Case | 1 | 438 | 427 | 427 | -2.6% | 0.0% |

#### D. Viet Nam-qXRv3

| **Country** | **Platform** | **Pool size** | **Pooling case** | **Pooling sensitivity** | **Pooling specificity: 0.98** | **Pooling specificity: 1** | **Comparator (Pooling sensitivity & specificity: 1)** | **Savings in specificity: 0.98** | **Savings in specificity: 1** |
| --- | --- | --- | --- | --- | --- | --- | --- | --- | --- |
| Viet Nam | qXRv3 | Pools of 3 | CXR Case | 0.95 | 2917 | 2917 | 2917 | 0.0% | 0.0% |
| Viet Nam | qXRv3 | Pools of 3 | General Pooling Case | 0.95 | 2067 | 2031 | 2086 | 0.9% | 2.6% |
| Viet Nam | qXRv3 | Pools of 3 | AI-guided Pooling Case | 0.95 | 2014 | 1983 | 2003 | -0.6% | 1.0% |
| Viet Nam | qXRv3 | Pools of 3 | AI-guided CAD Cohort Pooling Case | 0.95 | 2011 | 1979 | 2000 | -0.6% | 1.1% |
| Viet Nam | qXRv3 | Pools of 3 | CXR Case | 1 | 2917 | 2917 | 2917 | 0.0% | 0.0% |
| Viet Nam | qXRv3 | Pools of 3 | General Pooling Case | 1 | 2122 | 2086 | 2086 | -1.7% | 0.0% |
| Viet Nam | qXRv3 | Pools of 3 | AI-guided Pooling Case | 1 | 2035 | 2003 | 2003 | -1.6% | 0.0% |
| Viet Nam | qXRv3 | Pools of 3 | AI-guided CAD Cohort Pooling Case | 1 | 2031 | 2000 | 2000 | -1.6% | 0.0% |
| Viet Nam | qXRv3 | Pools of 4 | CXR Case | 0.95 | 2917 | 2917 | 2917 | 0.0% | 0.0% |
| Viet Nam | qXRv3 | Pools of 4 | General Pooling Case | 0.95 | 2072 | 2041 | 2110 | 1.8% | 3.3% |
| Viet Nam | qXRv3 | Pools of 4 | AI-guided Pooling Case | 0.95 | 1958 | 1928 | 1955 | -0.2% | 1.4% |
| Viet Nam | qXRv3 | Pools of 4 | AI-guided CAD Cohort Pooling Case | 0.95 | 1950 | 1921 | 1948 | -0.1% | 1.4% |
| Viet Nam | qXRv3 | Pools of 4 | CXR Case | 1 | 2917 | 2917 | 2917 | 0.0% | 0.0% |
| Viet Nam | qXRv3 | Pools of 4 | General Pooling Case | 1 | 2141 | 2110 | 2110 | -1.5% | 0.0% |
| Viet Nam | qXRv3 | Pools of 4 | AI-guided Pooling Case | 1 | 1984 | 1955 | 1955 | -1.5% | 0.0% |
| Viet Nam | qXRv3 | Pools of 4 | AI-guided CAD Cohort Pooling Case | 1 | 1976 | 1948 | 1948 | -1.4% | 0.0% |

#### E. Zambia- CAD4TB7

| **Country** | **Platform** | **Pool size** | **Pooling case** | **Pooling sensitivity** | **Pooling specificity: 0.98** | **Pooling specificity: 1** | **Comparator (Pooling sensitivity & specificity: 1)** | **Savings in specificity: 0.98** | **Savings in specificity: 1** |
| --- | --- | --- | --- | --- | --- | --- | --- | --- | --- |
| Zambia | CAD4TB7 | Pools of 3 | CXR Case | 0.95 | 1960 | 1960 | 1960 | 0.0% | 0.0% |
| Zambia | CAD4TB7 | Pools of 3 | General Pooling Case | 0.95 | 1335 | 1309 | 1344 | 0.7% | 2.6% |
| Zambia | CAD4TB7 | Pools of 3 | AI-guided Pooling Case | 0.95 | 1216 | 1189 | 1211 | -0.4% | 1.8% |
| Zambia | CAD4TB7 | Pools of 3 | AI-guided CAD Cohort Pooling Case | 0.95 | 1201 | 1174 | 1194 | -0.6% | 1.7% |
| Zambia | CAD4TB7 | Pools of 3 | CXR Case | 1 | 1960 | 1960 | 1960 | 0.0% | 0.0% |
| Zambia | CAD4TB7 | Pools of 3 | General Pooling Case | 1 | 1369 | 1344 | 1344 | -1.9% | 0.0% |
| Zambia | CAD4TB7 | Pools of 3 | AI-guided Pooling Case | 1 | 1237 | 1211 | 1211 | -2.2% | 0.0% |
| Zambia | CAD4TB7 | Pools of 3 | AI-guided CAD Cohort Pooling Case | 1 | 1221 | 1194 | 1194 | -2.3% | 0.0% |
| Zambia | CAD4TB7 | Pools of 4 | CXR Case | 0.95 | 1960 | 1960 | 1960 | 0.0% | 0.0% |
| Zambia | CAD4TB7 | Pools of 4 | General Pooling Case | 0.95 | 1331 | 1309 | 1352 | 1.6% | 3.2% |
| Zambia | CAD4TB7 | Pools of 4 | AI-guided Pooling Case | 0.95 | 1178 | 1154 | 1181 | 0.3% | 2.3% |
| Zambia | CAD4TB7 | Pools of 4 | AI-guided CAD Cohort Pooling Case | 0.95 | 1151 | 1127 | 1152 | 0.1% | 2.2% |
| Zambia | CAD4TB7 | Pools of 4 | CXR Case | 1 | 1960 | 1960 | 1960 | 0.0% | 0.0% |
| Zambia | CAD4TB7 | Pools of 4 | General Pooling Case | 1 | 1374 | 1352 | 1352 | -1.6% | 0.0% |
| Zambia | CAD4TB7 | Pools of 4 | AI-guided Pooling Case | 1 | 1206 | 1181 | 1181 | -2.1% | 0.0% |
| Zambia | CAD4TB7 | Pools of 4 | AI-guided CAD Cohort Pooling Case | 1 | 1177 | 1152 | 1152 | -2.2% | 0.0% |

### Supplementary table 4 note

The sensitivity analysis is presented in five tables by country and platform combinations. The analysis presents all possible combination of pool sizes (3 or 4), pooling sensitivity of 0.95 or 1, and pooling specificity of 0.98 and 1, across the five approaches (Base case, CXR Case, General Pooling Case, AI-guided Pooling Case, AI-guided CAD Cohort Pooling Case). The percentages indicate savings against the base case with pooling sensitivity and specificity of 1.

## Supplementary table 5.

Supplementary table 5. Incremental and cumulative savings by country

|  | **Total tests** | **Incremental savings** | | **Cumulative savings** | |
| --- | --- | --- | --- | --- | --- |
|  | **N** | **N** | **%** | **N** | **%** |
| **Bangladesh-qXRv3** |  |  |  |  |  |
| Base case | 24,079 | — | — | — | — |
| CXR approach | 11,448 | 12,631 | 52.5% | 12,631 | 52.5% |
| Indiscriminate pooling approach | 11,676 | -228 | -2.0% | 12,403 | 51.5% |
| AI-guided pooling approach | 9,262 | 2,414 | 20.7% | 14,817 | 61.5% |
| AI-guided CAD cohort pooling case | 9,221 | 41 | **0.4%** | 14,858 | 61.7% |
| **Bangladesh-CAD4TB6** |  |  |  |  |  |
| Base case | 24,079 | — | — | — | — |
| CXR approach | 11,750 | 12,329 | 51.2% | 12,329 | 51.2% |
| Indiscriminate pooling approach | 11,819 | -69 | -0.6% | 12,260 | 50.9% |
| AI-guided pooling approach | 9,200 | 2,619 | 22.2% | 14,879 | 61.8% |
| AI-guided CAD cohort pooling case | 9,097 | 103 | **1.1%** | 14,982 | 62.2% |
| **Nigeria-qXRv3** |  |  |  |  |  |
| Base case | 1,021 | — | — | — | — |
| CXR approach | 738 | 283 | 27.7% | 283 | 27.7% |
| Indiscriminate pooling approach | 459 | 279 | 37.8% | 562 | 55.0% |
| AI-guided pooling approach | 434 | 25 | 5.4% | 587 | 57.5% |
| AI-guided CAD cohort pooling case | 427 | 7 | **1.6%** | 594 | 58.2% |
| **Viet Nam-qXRv3** |  |  |  |  |  |
| Base case | 5,074 | — | — | — | — |
| CXR approach (sensitivity=95.3%) | 2,917 | 2,157 | 42.5% | 2,157 | 42.5% |
| Indiscriminate pooling approach | 2,110 | 807 | 27.7% | 2,964 | 58.4% |
| AI-guided pooling approach | 1,955 | 155 | 7.3% | 3,119 | 61.5% |
| AI-guided CAD cohort pooling case | 1,948 | 7 | **0.4%** | 3,126 | 61.6% |
| **Zambia-CAD4TB7** |  |  |  |  |  |
| Base case | 2,353 | — | — | — | — |
| CXR approach | 1,960 | 393 | 16.7% | 393 | 16.7% |
| Indiscriminate pooling approach | 1,352 | 608 | 31.0% | 1,001 | 42.5% |
| AI-guided pooling approach | 1,181 | 171 | 12.6% | 1,172 | 49.8% |
| AI-guided CAD cohort pooling case | 1,152 | 29 | **2.5%** | 1,201 | 51.0% |

### Supplementary table 5 note

The model assumes pool sizes of 4 with both pooling and individual testing sensitivity and specificity of 100% for a testing threshold resulting in missed cases of 4.4%, 5.1%, 4.7%, 5.1% and 3.3% for Bangladesh-qXRv3, Bangladesh-CAD4TB6, Nigeria-qXRv3, Viet Nam-qXRv3 and Zambia-CAD4TB7, respectively. Incremental savings indicate the difference from the prior case, whereas cumulative savings are calculated against the baseline approach. This presents results for Bangladesh using both qXRv3 and CAD4TB6, and an additional approach highlighted in red, “AI-guided CAD cohort pooling case” for all countries.
